# Supplementary material for: Exploring intrinsically disordered proteins in Chlamydomonas reinhardtii
Source: PubMed Central journal article supplement (PMC5931566; doi:10.1038/s41598-018-24772-7), 2018-05-01
Supplement: 41598_2018_24772_MOESM1_ESM.pdf [file 41598_2018_24772_MOESM1_ESM.pdf]

Supplemental Data from the original manuscript by Zhang *et al.* entitled

**Exploring intrinsically disordered proteins in *Chlamydomonas reinhardtii***

Yizhi Zhang, H el ene Launay, Antoine Schramm, R egine Lebrun, Brigitte Gontero

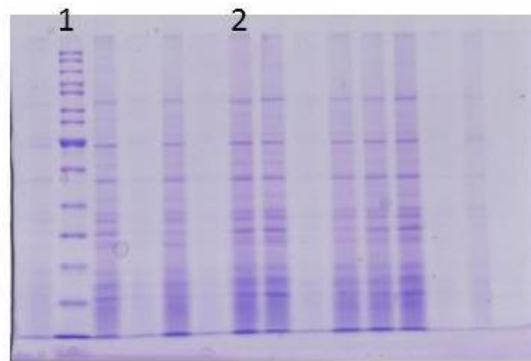

**Figure S1. SDS-PAGE.** Molecular weight markers (Euromedex. unstained protein ladder, (Lane 1). 10  $\mu$ g of non-membrane heat-treated proteins from *C. reinhardtii* were loaded and separated on 12% polyacrylamide gels under denaturing conditions and stained with Coomassie Blue. Bands from Lane 2 were cut and further analyzed while the other lanes were replicates but were not used in this study.

**Supplementary Table S2.** List of phosphopeptides identified by mass spectrometry. 19 proteins were found as disordered proteins (see % of disorder predicted by PONDR) and phosphorylated in our study. The phosphorylated residues in the phosphopeptides identified by mass spectrometry are in bold and indicated by an asterisk. AAs represents the number of amino acid residues. Grey colour showed the proteins that were absent in the phosphoproteome recently published by Wang *et al*, 2014.\*

| NCBI Accession | Name                                       | AAs  | %disorder | Phosphopeptide identified by MS                                                   |
|----------------|--------------------------------------------|------|-----------|-----------------------------------------------------------------------------------|
| XP_001698601   | Predicted protein                          | 2076 | 74.2      | AEEAEPAGPAAVEEEEAPT*SPR                                                           |
| XP_001696302   | Predicted protein                          | 720  | 79.4      | <b>T* S*</b> SSGGTAGAALTAPSAPR                                                    |
| XP_001698509   | Flagellar associated protein               | 515  | 74.4      | SEAVG <b>S*T</b> SVK <b>S*AK</b>                                                  |
| XP_001697581   | Hypothetical protein                       | 458  | 89.5      | QLGG <b>S*</b> GQQLSGLGGASR                                                       |
| XP_001703197   | Flagellar associated protein               | 443  | 75.2      | GG <b>S*</b> GSGAQAAAAPTQSFSGAKPEAK                                               |
| XP_001695654   | Predicted protein                          | 413  | 85.7      | HMQEVHGVSIQHD <b>S*DDER</b>                                                       |
| XP_001702497   | Predicted protein                          | 104  | 62.5      | RPA <b>S*</b> PPNPQAVLQAK                                                         |
| XP_001695463   | Predicted protein                          | 494  | 74.5      | ATAD <b>S*</b> DDEGESAKPASTSLGAAAAASGK<br>SVGGAPD <b>S*</b> PQLPGGGAAGPSPEWDDSPAR |
| XP_001691264   | GTPase activation protein                  | 1138 | 65.7      | VPEPGASAPK <b>S*</b> PLATPVEAPAQAASSPEAEVK                                        |
| XP_001697455   | Eukaryotic initiation factor               | 197  | 64        | ASLEDMMPSPD <b>S*</b> EESDQEEGQAGASAAAVAGAAK                                      |
| A2T2X4         | Intraflagellar transport protein 46        | 344  | 45.5      | TL <b>S*</b> PTGYEAGK                                                             |
| XP_001695456   | CC domain 6-like protein                   | 335  | 65.4      | SP <b>S*</b> STNNSFDR                                                             |
| XP_001698782   | Hypothetical protein                       | 577  | 83.5      | QSALQQQLAQVQVLALQQET*AAR                                                          |
| XP_001690066   | Telomere binding protein 1                 | 221  | 47.1      | T <b>S*</b> WQDLKDK                                                               |
| CAC94941       | Putative blue light receptor               | 749  | 37.3      | TIVDDVT*IAVEK                                                                     |
| XP_001699840   | Eukaryotic initiation factor               | 165  | 47.3      | EYTVIDITDEGIVSMMDESGNTRDDMFLPTGT*DESKLAEIMK                                       |
| XP_001700625   | Predicted protein                          | 168  | 61.9      | SPA <b>S*</b> DTYIIFGEAK<br><b>S*</b> KNILFVIQSPDVFK<br>NILFVIQ <b>S*</b> PDVFK   |
| XP_001694699   | O <sub>2</sub> -evolving enhancer protein1 | 291  | 33.3      | LTYTLDAMSG <b>S*</b> FK                                                           |

|                                                                                                                                                                                                                                      |                   |     |      |               |
|--------------------------------------------------------------------------------------------------------------------------------------------------------------------------------------------------------------------------------------|-------------------|-----|------|---------------|
| XP_001695560                                                                                                                                                                                                                         | Predicted protein | 145 | 26.9 | ALGKS*PTEAEIK |
| *Wang, H. <i>et al.</i> The global phosphoproteome of <i>Chlamydomonas reinhardtii</i> reveals complex organellar phosphorylation in the flagella and thylakoid membrane. <i>Mol Cell Proteomics</i> , <b>13</b> , 2337-2353 (2014). |                   |     |      |               |

**Supplementary Table S3.** List of proteins found both in our study and in the *C. reinhardtii* phosphoproteome (Wang, H. *et al.* The global phosphoproteome of *Chlamydomonas reinhardtii* reveals complex organellar phosphorylation in the flagella and thylakoid membrane. *Mol Cell Proteomics*, **13**, 2337-2353 (2014)).

| Uniprot Accession | NCBI Accession | Name                                   |
|-------------------|----------------|----------------------------------------|
| A2T2X4            | A2T2X4         | Intraflagellar transport protein 46    |
| Q945T1            | AAK96224       | Co-chaperone CGE1 precursor isoform b  |
| Q2HZ24            | ABC88602       | Putative ferredoxin                    |
| A8HPN4            | XP_001689480   | Plastid ribosomal protein S21          |
| A8HPT6            | XP_001689504   | Predicted protein                      |
| Q6RCE1            | XP_001689563   | Intraflagellar transport protein 74/72 |
| A8HQH6            | XP_001689584   | Predicted protein                      |
| A8HQM6            | XP_001689600   | Predicted protein                      |
| A8HQT1            | XP_001689618   | Protein disulfide isomerase            |
| A8HMD3            | XP_001689665   | Hypothetical protein                   |
| A8HMG7            | XP_001689675   | Ribosomal protein L26                  |
| A8HMQ1            | XP_001689702   | Aconitate hydratase                    |
| A8HN94            | XP_001689751   | Predicted protein                      |
| Q84XR9            | XP_001689786   | Thioredoxin x                          |
| A8HNX3            | XP_001689832   | Ribosomal protein L35                  |
| A8HP02            | XP_001689841   | Predicted protein                      |
| A8HP06            | XP_001689842   | Succinate dehydrogenase subunit A      |
| A8HP55            | XP_001689859   | Ribosomal protein L5                   |

|        |              |                                          |
|--------|--------------|------------------------------------------|
| A8HP84 | XP_001689871 | Glyceraldehyde-3-phosphate dehydrogenase |
| A8HP90 | XP_001689873 | Ribosomal protein L6                     |
| A8HPE9 | XP_001689890 | Predicted protein                        |
| A8HPM8 | XP_001689925 | Predicted protein                        |
| Q39568 | XP_001690066 | G-strand telomere binding protein 1      |
| A8HMA8 | XP_001690119 | Acetyl-coa biotin carboxyl carrier       |
| A8HMJ6 | XP_001690151 | Predicted protein                        |
| A8HMS5 | XP_001690177 | Predicted protein                        |
| A8HMW1 | XP_001690192 | Predicted protein                        |
| A8HNG8 | XP_001690252 | Uncharacterized luminal polypeptide      |
| A8HNY3 | XP_001690288 | Predicted protein                        |
| A8IHY1 | XP_001690324 | Hypothetical protein                     |
| A8IIC7 | XP_001690351 | Hypothetical protein                     |
| A8IIP7 | XP_001690375 | 26S proteasome regulatory subunit        |
| Q546J6 | XP_001690415 | SF-assemblin                             |
| A8IGY1 | XP_001690424 | Ribosomal protein S13                    |
| A8IHF8 | XP_001690456 | NimA-related protein kinase 8            |
| Q6UPR1 | XP_001690509 | NimA-related protein kinase 5            |
| A8IGH1 | XP_001690591 | Superoxide dismutase [Fe]                |
| A8IH77 | XP_001690629 | Subunit H of photosystem I               |
| A8IJQ1 | XP_001690805 | Iron-sulfur cluster assembly protein     |
| A8IK44 | XP_001690833 | Predicted protein                        |
| A8IJ27 | XP_001690957 | Predicted protein                        |
| A8IJ76 | XP_001690963 | Hypothetical protein                     |
| A8ILB6 | XP_001691099 | UPF3 protein                             |
| A8IMV0 | XP_001691227 | Hypothetical protein                     |
| A8IMZ5 | XP_001691232 | Magnesium chelatase subunit I            |

|        |              |                                                             |
|--------|--------------|-------------------------------------------------------------|
| A8INH1 | XP_001691264 | Potential GTPase activation protein                         |
| Q2HZ24 | XP_001691381 | Apoferredoxin                                               |
| A8IP08 | XP_001691449 | Predicted protein                                           |
| A8IP53 | XP_001691459 | Translation initiation protein                              |
| A8IPB8 | XP_001691464 | Predicted protein                                           |
| A8IAW5 | XP_001691500 | Hypothetical protein                                        |
| A8IR30 | XP_001691526 | Iron-sulfur cluster assembly protein                        |
| A8IRA4 | XP_001691553 | Protein kinase                                              |
| A8IQU3 | XP_001691632 | Beta subunit of mitochondrial ATP synthase                  |
| A8IRB7 | XP_001691710 | Predicted protein                                           |
| A8IRH4 | XP_001691826 | Metacaspase type II                                         |
| A8IRV0 | XP_001691869 | HSP70-HSP90 organizing protein                              |
| A8IRV6 | XP_001691870 | Eukaryotic initiation factor                                |
| Q540H1 | XP_001691876 | Tubulin alpha-1 chain                                       |
| A8IS75 | XP_001691919 | Hypothetical protein                                        |
| A8IRK5 | XP_001691998 | Hypothetical protein                                        |
| A8IRQ1 | XP_001692016 | Ribose-5-phosphate isomerase                                |
| A8IRU6 | XP_001692034 | Peptidyl-prolyl cis-trans isomerase, cyclophilin-type       |
| A8ISK5 | XP_001692126 | Hypothetical protein                                        |
| A8ISS9 | XP_001692268 | Hypothetical protein                                        |
| A8ITH3 | XP_001692382 | Predicted protein                                           |
| A8ITL0 | XP_001692395 | Mitochondrial F1F0 ATP synthase associated 60.6 kDa protein |
| Q945T2 | XP_001692412 | GrpE nucleotide release factor                              |
| A8IU13 | XP_001692457 | Predicted protein                                           |
| A8IUB8 | XP_001692499 | Predicted protein                                           |
| A8ITH8 | XP_001692504 | Chaperonin 60B2                                             |
| A8ITQ1 | XP_001692527 | P23 co-chaperone of HSP90 system                            |

|        |              |                                                             |
|--------|--------------|-------------------------------------------------------------|
| A8IU79 | XP_001692603 | WW domain protein                                           |
| A8IUC3 | XP_001692618 | Plastid ribosomal protein L32                               |
| A8IUV6 | XP_001692669 | Predicted protein                                           |
| A8IUG8 | XP_001692826 | Plastidic thioredoxin-like protein                          |
| A8IW20 | XP_001693051 | Eukaryotic initiation factor                                |
| P93106 | XP_001693118 | Malate dehydrogenase                                        |
| A8IXT4 | XP_001693239 | Hypothetical protein                                        |
| A8IWG9 | XP_001693253 | Predicted protein                                           |
| A8IWK2 | XP_001693262 | Ferredoxin thioredoxin reductase, catalytic chain           |
| A8IXU7 | XP_001693387 | Phototropin                                                 |
| A8HRZ0 | XP_001693443 | Histone H1                                                  |
| A8HSE5 | XP_001693473 | Predicted protein                                           |
| A8HTX7 | XP_001693576 | Mitochondrial F1F0 ATP synthase associated 31.2 kDa protein |
| A8HUK0 | XP_001693615 | Peptidyl-prolyl cis-trans isomerase, FKBP-type              |
| A8HUN2 | XP_001693621 | SR protein factor                                           |
| A2PZC2 | XP_001693685 | UDP-Glucose:protein transglucosylase                        |
| A8HS48 | XP_001693710 | Ribosomal protein S3a                                       |
| Q4U0V9 | XP_001693726 | CTR type copper ion transporter                             |
| A8HSU1 | XP_001693753 | Predicted protein                                           |
| Q6UKY5 | XP_001693782 | Acyl-carrier protein                                        |
| A8HTE8 | XP_001693784 | Qb-SNARE protein, VTI1-family                               |
| A8HTG7 | XP_001693788 | Glycine-rich protein                                        |
| Q66YD0 | XP_001693830 | Vesicle inducing protein in plastids 1                      |
| A8IXZ0 | XP_001693997 | Beta tubulin 2                                              |
| A8IYP4 | XP_001694038 | Phosphoribulokinase                                         |
| A8IY98 | XP_001694099 | Predicted protein                                           |
| A8IYH9 | XP_001694126 | Oxygen-evolving enhancer protein 2 of photosystem II        |

|        |              |                                                      |
|--------|--------------|------------------------------------------------------|
| A8IYJ6 | XP_001694135 | Predicted protein                                    |
| A8IYP5 | XP_001694158 | Thioredoxin h2                                       |
| A8IZ90 | XP_001694245 | Hypothetical protein                                 |
| A6Q0K5 | XP_001694345 | Small protein associating with GAPDH and PRK (CP12)  |
| A8IZS5 | XP_001694459 | Glycine-rich RNA-binding protein                     |
| A8IZX7 | XP_001694490 | Flagellar associated protein                         |
| A8IZQ8 | XP_001694569 | Predicted protein                                    |
| A8IZV5 | XP_001694594 | Bifunctional GTP cyclohydrolase II                   |
| A8J087 | XP_001694669 | Vasa intronic gene                                   |
| A8J098 | XP_001694675 | Flagellar associated protein                         |
| A8J0E4 | XP_001694699 | Oxygen-evolving enhancer protein 1 of photosystem II |
| Q9FYV4 | XP_001694742 | Copper chaperone                                     |
| A8J0D9 | XP_001694780 | Flagellar associated protein                         |
| A8J0R4 | XP_001694856 | Acidic ribosomal protein P2                          |
| A8J152 | XP_001694924 | Predicted protein                                    |
| A8J1A3 | XP_001694951 | Ribosomal protein L24                                |
| A8J0N4 | XP_001694962 | Protein phosphatase 2C                               |
| A8J0Q8 | XP_001694975 | Thioredoxin-related protein CITRX                    |
| A8J1G8 | XP_001695102 | Ribosomal protein S6                                 |
| A8J1T4 | XP_001695163 | Dihydrolipoyl dehydrogenase                          |
| A8J1V5 | XP_001695174 | Dihydrolipoamide acetyltransferase                   |
| A8J1C2 | XP_001695181 | Predicted protein                                    |
| A8J1I6 | XP_001695217 | Predicted protein                                    |
| A8J1T5 | XP_001695261 | Flagella associated protein                          |
| A8J237 | XP_001695329 | Component of the ESCRT-III complex                   |
| A8J2J7 | XP_001695406 | Radial spoke protein 3                               |
| A8J246 | XP_001695456 | Coiled-coil domain 6-like protein                    |

|        |              |                                                               |
|--------|--------------|---------------------------------------------------------------|
| A8J257 | XP_001695461 | Predicted protein                                             |
| A8J265 | XP_001695463 | Predicted protein                                             |
| A8J2H2 | XP_001695521 | Predicted protein                                             |
| A8J2K0 | XP_001695533 | Predicted protein                                             |
| A8J2K4 | XP_001695535 | Predicted protein                                             |
| A8J2Q0 | XP_001695560 | Hypothetical protein                                          |
| A8J354 | XP_001695636 | Hypothetical protein                                          |
| A8J2L0 | XP_001695654 | Predicted protein                                             |
| A8J2L7 | XP_001695659 | U6 small ribonucleoprotein F                                  |
| A8J2L8 | XP_001695660 | Hypothetical protein                                          |
| A8J311 | XP_001695725 | Hypothetical protein                                          |
| A8J383 | XP_001695755 | Hypothetical protein                                          |
| A8J3A8 | XP_001695783 | Ubiquitin-like protein                                        |
| A8J3E3 | XP_001695908 | Peptidyl-prolyl cis-trans isomerase, parvulin-type            |
| A8J3E8 | XP_001695911 | Hypothetical protein                                          |
| A8J3U1 | XP_001695981 | Flagellar associated protein, protease inhibitor-like protein |
| A8J3V2 | XP_001695986 | Hypothetical protein                                          |
| A8J4C9 | XP_001696012 | Flagellar associated protein                                  |
| A8J4E7 | XP_001696019 | Hypothetical protein                                          |
| A8J4E5 | XP_001696101 | Hypothetical protein                                          |
| Q39576 | XP_001696172 | Histone H1                                                    |
| A8HVK4 | XP_001696195 | Ribosomal protein S27a                                        |
| A8HVQ1 | XP_001696201 | Ribosomal protein S8                                          |
| A8HW77 | XP_001696233 | Hypothetical protein                                          |
| A8HWA8 | XP_001696238 | Pyridine nucleotide binding protein                           |
| A8HWC5 | XP_001696241 | Hypothetical protein                                          |
| A8HX54 | XP_001696302 | Predicted protein                                             |



|        |              |                                                             |
|--------|--------------|-------------------------------------------------------------|
| A8HXN9 | XP_001696339 | Subunit of GARP complex                                     |
| A8HYR6 | XP_001696422 | Subunit of the circadian RNA-binding protein CHLAMY 1       |
| A8HYV3 | XP_001696432 | Heat shock protein 70B                                      |
| A8HVV6 | XP_001696483 | Hypothetical protein                                        |
| A8HX38 | XP_001696568 | Eukaryotic translation elongation factor 1 alpha 1          |
| Q7X7A7 | XP_001696613 | 14-3-3 protein                                              |
| A8HY43 | XP_001696624 | Thylakoid lumenal protein                                   |
| A8HYD5 | XP_001696637 | Glycine cleavage system, H-protein                          |
| A8HYF5 | XP_001696639 | Predicted protein                                           |
| A8HYK1 | XP_001696645 | Flagellar associated protein                                |
| A8HYP5 | XP_001696653 | Predicted protein                                           |
| A8HYU5 | XP_001696661 | S-Adenosylmethionine synthetase                             |
| A8J4I5 | XP_001696675 | Hypothetical protein                                        |
| A8J4M0 | XP_001696688 | Hypothetical protein                                        |
| A8J4Z4 | XP_001696742 | Mitochondrial F1F0 ATP synthase associated 45.5 kDa protein |
| A8J513 | XP_001696755 | Nucleosome assembly protein                                 |
| A8J537 | XP_001696763 | Catalase/oxidase                                            |
| A8J4I2 | XP_001696769 | SR protein factor                                           |
| A8J4N7 | XP_001696785 | Protein phosphatase 2C                                      |
| A8J4Q7 | XP_001696792 | Rieske [2Fe-2S] protein                                     |
| A8J5K6 | XP_001696896 | Hypothetical protein                                        |
| A8J601 | XP_001696929 | Paf1 complex component                                      |
| A8J597 | XP_001696972 | Ribosomal protein L12                                       |
| A8J5K4 | XP_001697006 | Nucleolar protein, component of C/D snoRNPs                 |
| A8J5N1 | XP_001697015 | Hypothetical protein                                        |
| A8J5S4 | XP_001697033 | Hypothetical protein                                        |
| A8J696 | XP_001697082 | Hypothetical protein                                        |

|        |              |                                       |
|--------|--------------|---------------------------------------|
| A8J6C3 | XP_001697099 | Phosphoglucan water dikinase          |
| A8J6L2 | XP_001697145 | Deflagellation inducible protein      |
| A8J6P6 | XP_001697253 | Hypothetical protein                  |
| A8J785 | XP_001697332 | CF0 ATP synthase subunit II precursor |
| A8J728 | XP_001697365 | Hypothetical protein                  |
| A8J7H0 | XP_001697517 | Predicted protein                     |
| A8J7H2 | XP_001697518 | Predicted protein                     |
| A8J7J4 | XP_001697529 | Predicted protein                     |
| A8J7P4 | XP_001697556 | Predicted protein                     |
| A8J7W0 | XP_001697581 | Hypothetical protein                  |
| A7UCH9 | XP_001697606 | Carbonic anhydrase 8                  |
| A8J7T7 | XP_001697622 | Cysteine endopeptidase                |
| A8J814 | XP_001697667 | Prefoldin-related KE2-like protein    |
| A8J8B3 | XP_001697794 | Diaminopimelate epimerase             |
| A8J8I8 | XP_001697840 | Flagellar associated protein          |
| A8J8K9 | XP_001697851 | Hypothetical protein                  |
| A8J8M5 | XP_001697858 | Plastid ribosomal protein S5          |
| A8J8Q1 | XP_001697869 | Histone H3 variant                    |
| A8J8H5 | XP_001697903 | Predicted protein                     |
| A8J8I6 | XP_001697908 | VID72-domain protein                  |
| A8J8X1 | XP_001697985 | Hypothetical protein                  |
| A8J8X6 | XP_001697986 | Predicted protein                     |
| A8J906 | XP_001697999 | Hypothetical protein                  |
| A8J929 | XP_001698012 | Hypothetical protein                  |
| A8J8V6 | XP_001698051 | Hypothetical protein                  |
| A8J920 | XP_001698086 | Hypothetical protein                  |
| A8J9D9 | XP_001698149 | Plastid ribosomal protein L24         |

|        |              |                                                                          |
|--------|--------------|--------------------------------------------------------------------------|
| A8J9G0 | XP_001698156 | Hypothetical protein                                                     |
| A8J995 | XP_001698202 | Predicted thylakoid lumen protein                                        |
| A8J9E8 | XP_001698230 | Hypothetical protein                                                     |
| A8J9H8 | XP_001698246 | Flagellar associated protein, nucleoside diphosphate kinase-like protein |
| A8HZF9 | XP_001698307 | Hypothetical protein                                                     |
| A8I0K6 | XP_001698374 | Predicted protein                                                        |
| A8I0Z4 | XP_001698396 | Nucleolar GTP-binding protein                                            |
| A8I1R3 | XP_001698453 | Hypothetical protein                                                     |
| A8HZT8 | XP_001698509 | Flagellar associated protein                                             |
| A8I1B8 | XP_001698607 | RNA export factor                                                        |
| A8J9T0 | XP_001698669 | Ribosomal protein S12                                                    |
| A8J9R3 | XP_001698696 | Flagellar associated protein                                             |
| A8J9X1 | XP_001698736 | Mitochondrial F1F0 ATP synthase, delta subunit                           |
| A8JAH0 | XP_001698907 | Hypothetical protein                                                     |
| A8JAH1 | XP_001698908 | Reticulon-like protein                                                   |
| A8JA83 | XP_001698921 | Dicer-like protein                                                       |
| A8JAL6 | XP_001698978 | Plastid ribosomal protein L15                                            |
| A8JAQ8 | XP_001699051 | Hypothetical protein                                                     |
| A8JAU7 | XP_001699067 | Hypothetical protein                                                     |
| A8JAV1 | XP_001699068 | Actin                                                                    |
| A8JAT7 | XP_001699108 | Nuclear SR-like RNA binding protein                                      |
| A8JBM7 | XP_001699330 | Hypothetical protein                                                     |
| A8JBF2 | XP_001699339 | Organellar elongation factor P                                           |
| A8JBL9 | XP_001699367 | Hypothetical protein                                                     |
| A8JC40 | XP_001699499 | Centrin                                                                  |
| A8JC42 | XP_001699500 | Transmembrane ATPase                                                     |
| A8JC04 | XP_001699523 | Phosphoglycerate kinase                                                  |

|        |              |                                                                        |
|--------|--------------|------------------------------------------------------------------------|
| A8JC79 | XP_001699601 | Flagella associated protein                                            |
| A8JCA2 | XP_001699614 | Hypothetical protein                                                   |
| Q96550 | XP_001699641 | Mitochondrial F1F0 ATP synthase, alpha subunit                         |
| A8I2N3 | XP_001699643 | Flagellar associated protein                                           |
| A8I2V3 | XP_001699660 | 2-cys peroxiredoxin                                                    |
| A8I3Q0 | XP_001699725 | Flagellar associated protein, transcriptional coactivator-like protein |
| A8I439 | XP_001699752 | Flagellar associated protein                                           |
| A8I459 | XP_001699756 | Acetylornithine deacetylase                                            |
| A8I4P5 | XP_001699797 | Ribosomal protein S3                                                   |
| A8I297 | XP_001699840 | Eukaryotic initiation factor                                           |
| Q9FED4 | XP_001699846 | Regulator of CO2-responsive genes                                      |
| A8I2V7 | XP_001699891 | Hypothetical protein                                                   |
| A8I2E0 | XP_001700058 | Superoxide dismutase [Mn]                                              |
| Q6V504 | XP_001700114 | NADH : ubiquinone oxidoreductase 12.5 kDa subunit                      |
| A8JCS8 | XP_001700192 | Predicted protein                                                      |
| A8JCP3 | XP_001700220 | Predicted protein                                                      |
| A8JDA2 | XP_001700391 | Predicted protein                                                      |
| A8JDG6 | XP_001700473 | SR protein factor                                                      |
| A8JDM7 | XP_001700552 | Flagellar associated protein                                           |
| Q42690 | XP_001700659 | Fructose-1,6-bisphosphate aldolase                                     |
| A8I5N5 | XP_001700759 | Tetrapyrrole-binding protein                                           |
| Q8VZX3 | XP_001700765 | Ubiquitin-conjugating enzyme E2                                        |
| A8I7D9 | XP_001700869 | Hypothetical protein                                                   |
| A8I531 | XP_001700902 | Magnesium chelatase subunit D                                          |
| A8I5S5 | XP_001700943 | Hypothetical protein                                                   |
| A8JE81 | XP_001701106 | Hypothetical protein                                                   |
| Q84TR5 | XP_001701111 | Microtubule plus-end binding protein                                   |

|        |              |                                                          |
|--------|--------------|----------------------------------------------------------|
| A8JE91 | XP_001701113 | Chaperonin 60B1                                          |
| A8JE97 | XP_001701117 | Predicted protein                                        |
| A8JEB6 | XP_001701130 | Hypothetical protein                                     |
| A8JEE6 | XP_001701147 | Hypothetical protein                                     |
| A8JEC1 | XP_001701149 | Hypothetical protein                                     |
| A8JEG6 | XP_001701174 | Hypothetical protein                                     |
| A8JEJ5 | XP_001701186 | Vacuolar sorting receptor                                |
| A8JES1 | XP_001701310 | Mitochondrial grpE-type co-chaperone of the HSP70 system |
| A8JEU4 | XP_001701326 | Heat shock protein 70A                                   |
| A8JEV1 | XP_001701331 | Oxygen evolving enhancer protein 3                       |
| A8JF07 | XP_001701375 | Predicted protein                                        |
| A8JFA1 | XP_001701480 | Predicted protein                                        |
| A8JFB1 | XP_001701485 | Porphobilinogen deaminase                                |
| A8JFG7 | XP_001701512 | Predicted protein                                        |
| A8JFL8 | XP_001701599 | Predicted protein                                        |
| A8IA98 | XP_001701651 | Predicted protein                                        |
| A8I7T8 | XP_001701685 | Binding protein 1                                        |
| A8I8Z1 | XP_001701760 | 6,7-dimethyl-8-ribityllumazine synthase                  |
| A8I9E8 | XP_001701792 | Flagella associated protein                              |
| A8IA45 | XP_001701846 | Vacuolar ATP synthase subunit B                          |
| A8IAN1 | XP_001701881 | Transketolase                                            |
| A8I8A3 | XP_001701911 | Plastid-specific ribosomal protein 3                     |
| A8I8M2 | XP_001701933 | Predicted protein                                        |
| A8I8T3 | XP_001701945 | SNF2 superfamily protein                                 |
| O49822 | XP_001701947 | Ascorbate peroxidase                                     |
| A8I9C7 | XP_001701983 | Peptidyl-prolyl cis-trans isomerase, FKBP-type           |
| A8I9D5 | XP_001701984 | Predicted protein                                        |

|        |              |                                                    |
|--------|--------------|----------------------------------------------------|
| A8I9I9 | XP_001701993 | Rieske ferredoxin                                  |
| A8JFN8 | XP_001702005 | Predicted protein                                  |
| A8JFR9 | XP_001702039 | Acetyl CoA synthetase                              |
| A8JFZ7 | XP_001702110 | Hypothetical protein                               |
| A8JG54 | XP_001702188 | Predicted protein                                  |
| A8JG73 | XP_001702217 | Flagellar associated protein                       |
| A8JG74 | XP_001702218 | Hypothetical protein                               |
| A8JGJ1 | XP_001702344 | Hypothetical protein                               |
| A8HX38 | XP_001702347 | Eukaryotic translation elongation factor 1 alpha 2 |
| A8JGM1 | XP_001702364 | Rhodanese-like Ca-sensing receptor                 |
| A8IBF4 | XP_001702511 | Predicted protein                                  |
| A8IBV4 | XP_001702538 | Predicted protein                                  |
| A8ICC8 | XP_001702577 | Inorganic pyrophosphatase                          |
| A8ICE4 | XP_001702580 | Plastid ribosomal protein L11                      |
| A8ICV4 | XP_001702611 | Photosystem I 8 kDa reaction center subunit IV     |
| A8ID43 | XP_001702633 | Predicted protein                                  |
| A8ID55 | XP_001702637 | Basal body protein                                 |
| A8IBU6 | XP_001702713 | Nuclear ribonucleoprotein                          |
| A8JGW2 | XP_001702816 | Cytochrome b6f complex subunit V                   |
| A8JGX7 | XP_001702846 | DnaJ-like protein                                  |
| A8JH12 | XP_001702884 | Predicted protein                                  |
| A8JH68 | XP_001702952 | Plastocyanin, chloroplast precursor                |
| A8JH98 | XP_001702971 | Enolase                                            |
| A8JH97 | XP_001702993 | Predicted protein                                  |
| A8JHJ9 | XP_001703087 | Predicted protein                                  |
| A8JHN0 | XP_001703141 | Predicted protein                                  |
| Q6EMK7 | XP_001703164 | Chloroplast-targeted RNA-binding protein           |

|        |              |                                                           |
|--------|--------------|-----------------------------------------------------------|
| A8JHX9 | XP_001703215 | Elongation factor 2                                       |
| A8JHX0 | XP_001703230 | PCNA proliferating cell nuclear antigen                   |
| Q9M6B0 | XP_001703258 | Coiled-coil protein associated with protofilament ribbons |
| A8IDP6 | XP_001703420 | Calmodulin                                                |
| A8IDQ4 | XP_001703422 | Hypothetical protein                                      |
| A8IDS5 | XP_001703427 | Hypothetical protein                                      |
| Q84X71 | XP_001703461 | Hypothetical protein                                      |
| Q84X77 | XP_001703484 | Predicted protein                                         |
| Q84X79 | XP_001703492 | CR008 protein                                             |
| A8JI94 | XP_001703679 | Ribosomal protein L22                                     |
| A8JIB7 | XP_001703692 | Chaperonin 60A                                            |
| A8JIB8 | XP_001703693 | RNA binding protein                                       |
| A8JIE0 | XP_001703710 | Chaperonin 20                                             |
| A8JIE5 | XP_001703723 | Ribosomal protein S29                                     |
| A8JII9 | XP_001703774 | Flagellar associated protein                              |
| A8IIA8 | XP_001690346 | Hypothetical protein                                      |
